# Supplementary material for: How Laws Affect the Perception of Norms: Empirical Evidence from the Lockdown
Source: PLOS journal article supplement (doi:10.1371/journal.pone.0256624), 2020-01-01
Supplement: S7 (10.1371/journal.pone.0256624.s007) [file journal.pone.0256624.s007]

|                                        | <b>Control</b>       | <b>UK</b>              | <b>Overall</b>        |
|----------------------------------------|----------------------|------------------------|-----------------------|
| <b>Women</b>                           | 56.6%                | 50.4%                  | 55.9%                 |
| <b>Years of Education</b>              | 16.20<br>(4.815)     | 17.26<br>(3.713)       | 16.33<br>(4.711)      |
| <b>Age</b>                             | 38.22<br>(12.84)     | 43.54<br>(12.89)       | 38.85<br>(12.96)      |
| <b>Single</b>                          | 45.1%                | 33.0%                  | 43.7%                 |
| <b>Number of Household Members</b>     | 2.863<br>(1.591)     | 2.664<br>(1.356)       | 2.839%<br>(1.566)     |
| <b>First income quintile</b>           | 8.60%                | 10.68%                 | 10.43%                |
| <b>Second income quintile</b>          | 6.51%                | 6.66%                  | 6.64%                 |
| <b>Third income quintile</b>           | 4.90%                | 7.18%                  | 6.91%                 |
| <b>Fourth income quintile</b>          | 12.13%               | 12.56%                 | 12.51%                |
| <b>Fourth income quintile</b>          | 67.86%               | 62.92%                 | 63.50%                |
| <b>Confirmed COV-19 cases p.c.</b>     | 0.206<br>(0.290)     | 0.0978<br>(0.0409)     | 0.193%<br>(0.275)     |
| <b>Lag confirmed COV-19 cases p.c.</b> | 0.0259<br>(0.0339)   | 0.0141<br>(0.00676)    | 0.0245%<br>(0.0322)   |
| <b>Confirmed COV-19 deaths p.c.</b>    | 0.00591<br>(0.0169)  | 0.00553<br>(0.00410)   | 0.00587%<br>(0.0159)  |
| <b>Lag Confirmed COV-19 cases p.c.</b> | 0.00106<br>(0.00244) | 0.000985<br>(0.000863) | 0.00105%<br>(0.00231) |

**Note.** This table presents covariate means for control group countries, the UK, and the overall sample. The notation p.c. corresponds to per country. Standard deviation is reported in parentheses.
